# Supplementary material for: S100B Levels in Patients with Type 2 Diabetes Mellitus and Co-Occurring Depressive Symptoms
Source: Depress Res Treat. 2018 Nov 18;2018:5304759. doi: 10.1155/2018/5304759 (PMC6276443; doi:10.1155/2018/5304759)
Supplement: Supplementary Materials — Raw data regarding S100B measurements (OD readings with plate layout) is provided by the authors as supplementary material. [file 5304759.f1.xlsx]

## Sheet: Φύλλο1
	1	2	3	4	5	6	7	8	9	10	11	12
A	0.016	0.041	0.022	0.024	0.028	-0.005	0.025	-0.002	0.022
B	0.007	0.033	0.013	0.011	0.012	-0.010	0.012	-0.005	0.020
C	0.008	0.044	0.031	0.013	0.013	-0.011	0.016	-0.011	0.013
D	0.017	0.045	0.028	0.016	0.019	0.003	0.028	-0.008	0.017
E	0.014	0.067	0.018	0.015	0.021	-0.007	0.019	-0.006	0.015
F	0.015	0.057	0.020	0.017	0.017	0.001	0.018	0.000	0.034
G	0.024	0.082	0.030	0.023	0.017	-0.005	0.014	-0.006	0.015
H	0.025	0.083	0.017	0.016	0.012	-0.015	0.013	-0.010	0.011
